# Supplementary material
Source: HighWire-hosted journal article supplement (doi:10.1101/rna.072728.119)
Supplement: Supplemental_Charts.xlsx [file Supplemental_Charts.xlsx]

## Sheet: Fig. 1D
Editing site	WT editing ratio		Editing site selection:	COPA I/V
CDS	mean spleen (%)	mean cerebral cortex (%)
COPA I/V	8.7	6.03333
SPEG E/G	4.5	13.4333
SPEG S/G	34.1785	75.0476
UNC80 S/G	0.133333	32.9667
BLCAP Y/C	26.9667	39.5667
BLCAP Q/R	9.96667	27.9667
BLCAP K/R	5.03333	18.6333
FABP4 D/G	0	0
GluA2 R/G	-10	84.6
GluA2 Q/R	-10	99.9
HIST2H2AB L/L	0.666667	2.76667
HIST2H2AC N/S	0.166667	0.3
MFN1 I/V	1.3	4.63333
MFN1 Q/R	0	1.6
MFN1 A/A	0.0333333	3.7
MFN1 K/R	0.00251061	0.366667
IGFBP7 R/G	65.7667	64.3
IGFBP7 K/R	64.1667	61.851
Kv1.1 I/V	1.8	30.1333
DACT3 R/G	60.0333	91.0667
DACT3 K/R	3.3	11.7667
GluK5 N/D	1.63333	9.10934
GluK5 K/R	0.5	9.77904
GluA4 R/G	-10	65.2667
NEIL1 K/R	0.0666667	8.05004
NEIL1 K/K	0.133333	0.9
GLI1 R/G	1.66667	1.2
GluK2 I/V	-10	82.1667
GluK2 Y/C	-10	89.7333
GluK2 M/V	-10	6.69564
GluK2 Q/R	-10	80.9
C1QL1 Q/R	0.366667	1.96667
CYFIP2 K/E	0.5	83.1667
UBE2O S/G	1.66667	16.2333
ACTR10 A/A	0.3	0.333333
NOVA1 S/G	4.5	29.6
SERPINA1D E/G	0.0333333	0
CDK13 Q/R	61.8667	89.5333
CACNA1D I/M	0.4	43.4333
CACNA1D Y/C	0	21.3
CAPS1 E/G	-10	24.4667
COG3 I/V	33.2333	28.8
FLNB S/G	0.366667	2.3
FLNB Q/R	17.5333	33.8667
AZIN1 E/G	10.487	0.340771
AZIN1 S/G	19.4667	1.43333
GluK1 Q/R	-10	62.6333
SON - 1	0.366667	10.7667
SON - 2	0.474763	13.3424
SON - 3	0.721295	6.98931
SON - 4	1.2	34.1667
SON - 5	0.166667	3.26667
SON - 6	0.30328	0.905523
SON - 7	2.00886	22.8644
SON - 8	0.366667	1.66667
mGluR4 Q/R	0.1	9.8
TMEM63B Q/R	1.16667	72.3333
IK T/A	0.166667	0.1
ZFP397 S/G - 1	1.56667	8.13333
ZFP397 Y/C	1.2	4.56667
ZFP397 S/G - 2	1.73333	9.3
CNNM1 Q/Q	0.1	4.93333
FLNA Q/R	18.2667	30.7
GABRA3 I/M	48.4333	96.6333
GluA3 R/G	45.7	95.7
5-HT2CR A	-10	78.1068
5-HT2CR B	-10	70.6068
5-HT2CR E	-10	5.95824
5-HT2CR C	-10	29.4
5-HT2CR D	-10	75.0667
miR-200b-3p	0.0666667	1.63333
miR-455-5p - 1	0.1	0.0666667
miR-455-5p - 2	1.03333	0.233333
miR-3099-3p	-10	89
miR-27a-5p	3.3	12.8667
let-7g-5p	0	0.8
miR-34b-5p	-10	0.1
miR-142-5p - 1	0.452471	0.358456
miR-142-5p - 2	0.133333	0.1
miR-142-3p	0.0666667	0
miR-423-5p	0.166667	14.0667
miR-497-5p	1.66667	7.46667
miR-376a-2-5p	0.133333	28.6333
miR-376b-3p	-10	28.1333
miR-376c-3p	-10	71.7667
miR-379-5p	0.0333333	8.9
miR-381-3p	0.1	44.8
miR-411-5p	-10	41.9
miR-27b-5p	0.9	21.2333
miR-151-3p - 1	0.151785	4.11838
miR-151-3p - 2	0.366667	14.1
miR-99a-5p	1.86667	6.63333
miR-99b-3p - 1	1.39653	7.74595
miR-99b-3p - 2	2.03333	40.8
let-7e-5p	0.5	0.533333
miR-421-3p - 1	0	2.26667
miR-421-3p - 2	0.2	2.63333
CDS2 - 1	6.33333	2.13333
CDS2 - 2	45.5711	84.8144
CDS2 - 3	7.6	7.83333
IFT80 - 1	2.71182	30.9176
IFT80 - 2	1.96419	32.732
IFT80 - 3	8.06667	64.2667
NRAS	33.5667	19.2
JMJD4 - 1	9.9	1.56667
JMJD4 - 2	27.7267	31.9457
JMJD4 - 3	11.9333	29.6
JMJD4 - 4	14.9667	6.6
JMJD4 - 5	20.4333	18.7
JMJD4 - 6	18.7333	15.3333
JMJD4 - 7	24.4333	21.9333
JMJD4 - 8	22.5357	10.7035
JMJD4 - 9	12.0333	4.63333
TBCE	7.63333	67.2
MALT1	26.1667	34.0667
ADAR2 - 1	18.0333	24.2667
ADAR2 - 2	28.6667	37.5
ADAR2 - 3	17.7667	27.6
ADAR2 - 4	30.3	73.6667
COPA I/V	8.7	6.03333

## Sheet: Fig. 2A-2D
Cerebral cortex			Cerebral cortex			Spleen			Spleen			Editing site selection:	COPA I/V
Editing site	A1/WT	WT mean	Editing site	A2/WT	WT mean	Editing site	A1/WT	WT mean	Editing site	A2/WT	WT mean
CDS			CDS			CDS			CDS
COPA I/V	115.47	6.03333	COPA I/V	4.41989	6.03333	COPA I/V	78.5441	8.7	COPA I/V	2.29885	8.7
SPEG E/G	99.7519	13.4333	SPEG E/G	0.496278	13.4333	SPEG E/G			SPEG E/G
SPEG S/G	99.633	75.0476	SPEG S/G	30.383	75.0476	SPEG S/G	91.3355	34.1785	SPEG S/G	2.0369	34.1785
UNC80 S/G	107.887	32.9667	UNC80 S/G	0.101112	32.9667	UNC80 S/G			UNC80 S/G
BLCAP Y/C	41.5333	39.5667	BLCAP Y/C	101.853	39.5667	BLCAP Y/C	12.7318	26.9667	BLCAP Y/C	112.732	26.9667
BLCAP Q/R	48.7485	27.9667	BLCAP Q/R	96.3051	27.9667	BLCAP Q/R	24.7492	9.96667	BLCAP Q/R	103.344	9.96667
BLCAP K/R	5.72451	18.6333	BLCAP K/R	99.1055	18.6333	BLCAP K/R	6.62252	5.03333	BLCAP K/R	117.219	5.03333
GluA2 R/G	95.6265	84.6	GluA2 R/G	38.2191	84.6	GluA2 R/G			GluA2 R/G
GluA2 Q/R	100	99.8667	GluA2 Q/R			GluA2 Q/R			GluA2 Q/R
IGFBP7 R/G	133.333	64.3	IGFBP7 R/G	0.259202	64.3	IGFBP7 R/G	108.414	65.7667	IGFBP7 R/G	0.0506842	65.7667
IGFBP7 K/R	127.548	61.851	IGFBP7 K/R	4.5191	61.851	IGFBP7 K/R	111.036	64.1667	IGFBP7 K/R	1.20193	64.1667
Kv1.1 I/V	105.973	30.1333	Kv1.1 I/V	3.53982	30.1333	Kv1.1 I/V			Kv1.1 I/V
DACT3 R/G	38.3236	91.0667	DACT3 R/G	104.575	91.0667	DACT3 R/G	4.44198	60.0333	DACT3 R/G	157.024	60.0333
DACT3 K/R	118.414	11.7667	DACT3 K/R	7.08215	11.7667	DACT3 K/R			DACT3 K/R
GluK5 N/D	141.634	9.10934	GluK5 N/D	41.5822	9.10934	GluK5 N/D			GluK5 N/D
GluK5 K/R	20.1802	9.77904	GluK5 K/R	128.871	9.77904	GluK5 K/R			GluK5 K/R
GluA4 R/G	87.6404	65.2667	GluA4 R/G	28.2431	65.2667	GluA4 R/G			GluA4 R/G
NEIL1 K/R	2.13116	8.05004	NEIL1 K/R	112.966	8.05004	NEIL1 K/R			NEIL1 K/R
GluK2 I/V	96.5112	82.1667	GluK2 I/V	37.4037	82.1667	GluK2 I/V			GluK2 I/V
GluK2 Y/C	98.9599	89.7333	GluK2 Y/C	3.49183	89.7333	GluK2 Y/C			GluK2 Y/C
GluK2 M/V	88.8579	6.69564	GluK2 M/V	6.43796	6.69564	GluK2 M/V			GluK2 M/V
GluK2 Q/R	93.0779	80.9	GluK2 Q/R	32.8389	80.9	GluK2 Q/R			GluK2 Q/R
CYFIP2 K/E	99.0381	83.1667	CYFIP2 K/E	11.2625	83.1667	CYFIP2 K/E			CYFIP2 K/E
UBE2O S/G	5.13347	16.2333	UBE2O S/G	40.8624	16.2333	UBE2O S/G			UBE2O S/G
NOVA1 S/G	102.928	29.6	NOVA1 S/G	2.81532	29.6	NOVA1 S/G			NOVA1 S/G
CDK13 Q/R	72.4497	89.5333	CDK13 Q/R	103.946	89.5333	CDK13 Q/R	0.969828	61.8667	CDK13 Q/R	101.886	61.8667
CACNA1D I/M	90.2533	43.4333	CACNA1D I/M	1.15119	43.4333	CACNA1D I/M			CACNA1D I/M
CACNA1D Y/C	89.3584	21.3	CACNA1D Y/C	3.12989	21.3	CACNA1D Y/C			CACNA1D Y/C
CAPS1 E/G	80.5177	24.4667	CAPS1 E/G	30.7902	24.4667	CAPS1 E/G			CAPS1 E/G
COG3 I/V	103.819	28.8	COG3 I/V	24.4213	28.8	COG3 I/V	78.2347	33.2333	COG3 I/V	9.22768	33.2333
FLNB Q/R	107.283	33.8667	FLNB Q/R	2.3622	33.8667	FLNB Q/R	50.1901	17.5333	FLNB Q/R	0.380228	17.5333
AZIN1 E/G			AZIN1 E/G			AZIN1 E/G	0	10.487	AZIN1 E/G	117.902	10.487
AZIN1 S/G			AZIN1 S/G			AZIN1 S/G	0.342466	19.4667	AZIN1 S/G	160.616	19.4667
GluK1 Q/R	81.6392	62.6333	GluK1 Q/R	68.5471	62.6333	GluK1 Q/R			GluK1 Q/R
SON - 1	104.644	10.7667	SON - 1	6.81115	10.7667	SON - 1			SON - 1
SON - 2	21.2064	13.3424	SON - 2	142.491	13.3424	SON - 2			SON - 2
SON - 3	85.5117	6.98931	SON - 3	43.1728	6.98931	SON - 3			SON - 3
SON - 4	96.4878	34.1667	SON - 4	6.04878	34.1667	SON - 4			SON - 4
SON - 7	85.2763	22.8644	SON - 7	39.4545	22.8644	SON - 7			SON - 7
mGluR4 Q/R	110.204	9.8	mGluR4 Q/R	2.38095	9.8	mGluR4 Q/R			mGluR4 Q/R
TMEM63B Q/R	95.4378	72.3333	TMEM63B Q/R	0.506912	72.3333	TMEM63B Q/R			TMEM63B Q/R
ZFP397 S/G - 1	88.1148	8.13333	ZFP397 S/G - 1	57.377	8.13333	ZFP397 S/G - 1			ZFP397 S/G - 1
ZFP397 S/G - 2	95.3405	9.3	ZFP397 S/G - 2	52.6882	9.3	ZFP397 S/G - 2			ZFP397 S/G - 2
FLNA Q/R	95.7655	30.7	FLNA Q/R	0.651466	30.7	FLNA Q/R	78.6496	18.2667	FLNA Q/R	0.729927	18.2667
GABRA3 I/M	101.104	96.6333	GABRA3 I/M	32.3215	96.6333	GABRA3 I/M	62.6979	48.4333	GABRA3 I/M	55.7467	48.4333
GluA3 R/G	97.4922	95.7	GluA3 R/G	86.6945	95.7	GluA3 R/G	75.857	45.7	GluA3 R/G	17.3596	45.7
5-HT2CR A	8.49662	78.1068	5-HT2CR A	88.3944	78.1068	5-HT2CR A			5-HT2CR A
5-HT2CR B	2.00587	70.6068	5-HT2CR B	26.2148	70.6068	5-HT2CR B			5-HT2CR B
5-HT2CR E	73.9474	5.95824	5-HT2CR E	8.89914	5.95824	5-HT2CR E			5-HT2CR E
5-HT2CR C	57.7098	29.4	5-HT2CR C	27.0975	29.4	5-HT2CR C			5-HT2CR C
miR-3099-3p	100.337	89	miR-3099-3p	102.734	89	miR-3099-3p			miR-3099-3p
miR-27a-5p	50.7772	12.8667	miR-27a-5p	1.81347	12.8667	miR-27a-5p			miR-27a-5p
miR-423-5p	0.947867	14.0667	miR-423-5p	110.427	14.0667	miR-423-5p			miR-423-5p
miR-497-5p	147.768	7.46667	miR-497-5p	0.892857	7.46667	miR-497-5p			miR-497-5p
miR-376a-2-5p	171.013	28.6333	miR-376a-2-5p	21.4203	28.6333	miR-376a-2-5p			miR-376a-2-5p
miR-376b-3p	2.01422	28.1333	miR-376b-3p	250	28.1333	miR-376b-3p			miR-376b-3p
miR-376c-3p	1.67209	71.7667	miR-376c-3p	102.555	71.7667	miR-376c-3p			miR-376c-3p
miR-379-5p	115.73	8.9	miR-379-5p	17.9775	8.9	miR-379-5p			miR-379-5p
miR-381-3p	0.0744048	44.8	miR-381-3p	161.161	44.8	miR-381-3p			miR-381-3p
miR-411-5p	115.434	41.9	miR-411-5p	83.214	41.9	miR-411-5p			miR-411-5p
miR-27b-5p	91.9937	21.2333	miR-27b-5p	7.06436	21.2333	miR-27b-5p			miR-27b-5p
miR-151-3p - 2	5.20095	14.1	miR-151-3p - 2	109.693	14.1	miR-151-3p - 2			miR-151-3p - 2
miR-99a-5p	111.055	6.63333	miR-99a-5p	17.5879	6.63333	miR-99a-5p			miR-99a-5p
miR-99b-3p - 1	70.4605	7.74595	miR-99b-3p - 1	90.25	7.74595	miR-99b-3p - 1			miR-99b-3p - 1
CDS2 - 1			CDS2 - 1			CDS2 - 1	3.15789	6.33333	CDS2 - 1	94.7368	6.33333
CDS2 - 2	68.2371	84.8144	CDS2 - 2	92.4305	84.8144	CDS2 - 2	11.0457	45.5711	CDS2 - 2	92.5231	45.5711
CDS2 - 3	88.9362	7.83333	CDS2 - 3	10.2128	7.83333	CDS2 - 3	8.33333	7.6	CDS2 - 3	100	7.6
IFT80 - 1	5.5976	30.9176	IFT80 - 1	126.816	30.9176	IFT80 - 1			IFT80 - 1
IFT80 - 2	10.8337	32.732	IFT80 - 2	127.753	32.732	IFT80 - 2			IFT80 - 2
IFT80 - 3	15.1452	64.2667	IFT80 - 3	93.7759	64.2667	IFT80 - 3	0	8.06667	IFT80 - 3	156.612	8.06667
NRAS	52.9514	19.2	NRAS	57.4653	19.2	NRAS	2.87984	33.5667	NRAS	92.0556	33.5667
JMJD4 - 1			JMJD4 - 1			JMJD4 - 1	0	9.9	JMJD4 - 1	136.364	9.9
JMJD4 - 2	5.48596	31.9457	JMJD4 - 2	93.6858	31.9457	JMJD4 - 2	0	27.7267	JMJD4 - 2	148.496	27.7267
JMJD4 - 3	4.84234	29.6	JMJD4 - 3	106.757	29.6	JMJD4 - 3	0.558659	11.9333	JMJD4 - 3	170.67	11.9333
JMJD4 - 4	14.6465	6.6	JMJD4 - 4	70.202	6.6	JMJD4 - 4	2.89532	14.9667	JMJD4 - 4	133.185	14.9667
JMJD4 - 5	25.4902	18.7	JMJD4 - 5	51.3369	18.7	JMJD4 - 5	1.79445	20.4333	JMJD4 - 5	122.349	20.4333
JMJD4 - 6	33.6957	15.3333	JMJD4 - 6	24.7826	15.3333	JMJD4 - 6	0.88968	18.7333	JMJD4 - 6	117.616	18.7333
JMJD4 - 7	33.2827	21.9333	JMJD4 - 7	60.3343	21.9333	JMJD4 - 7	0.95498	24.4333	JMJD4 - 7	127.149	24.4333
JMJD4 - 8	6.02542	10.7035	JMJD4 - 8	75.5124	10.7035	JMJD4 - 8	0.0300667	22.5357	JMJD4 - 8	136.906	22.5357
JMJD4 - 9			JMJD4 - 9			JMJD4 - 9	1.10803	12.0333	JMJD4 - 9	129.363	12.0333
TBCE	31.8948	67.2	TBCE	99.8512	67.2	TBCE	4.80349	7.63333	TBCE	134.498	7.63333
MALT1	9.98043	34.0667	MALT1	118.395	34.0667	MALT1	0.127389	26.1667	MALT1	101.274	26.1667
ADAR2 - 1	91.7582	24.2667	ADAR2 - 1	30.7692	24.2667	ADAR2 - 1	70.4251	18.0333	ADAR2 - 1
ADAR2 - 2	102.933	37.5	ADAR2 - 2	33.3333	37.5	ADAR2 - 2	54.6512	28.6667	ADAR2 - 2
ADAR2 - 3	96.9807	27.6	ADAR2 - 3	34.9034	27.6	ADAR2 - 3	64.1651	17.7667	ADAR2 - 3
ADAR2 - 4	96.2443	73.6667	ADAR2 - 4	76.8326	73.6667	ADAR2 - 4	87.2387	30.3	ADAR2 - 4
COPA I/V	115.47	6.03333	COPA I/V	4.41989	6.03333	COPA I/V	78.5441	8.7	COPA I/V	2.29885	8.7

## Sheet: Fig. 4A 4B
Cerebral Cortex			Spleen			Editing site selection:	COPA I/V
Editing site	Adar preference level	mean WT	Editing site	Adar preference level	mean WT
CDS			CDS
COPA I/V	3.68664	6.03333	COPA I/V	2.8436	8.7			Cerebral Cortex						Spleen
SPEG E/G	0.49505	13.8	SPEG E/G	6.79612	34.1785
SPEG S/G	23.3686	79.7135	SPEG S/G
UNC80 S/G	0.093633	32.9667	UNC80 S/G
BLCAP Y/C	71.0341	39.5667	BLCAP Y/C	89.8522	26.9667
BLCAP Q/R	66.3928	27.9667	BLCAP Q/R	80.6789	9.96667
BLCAP K/R	94.5392	18.6333	BLCAP K/R	94.6524	5.03333
GluA2 R/G	28.5546	84.6	GluA2 R/G
IGFBP7 R/G	0.194024	64.3	IGFBP7 R/G	0.046729	65.7667
IGFBP7 K/R	3.42183	61.851	IGFBP7 K/R	1.07088	64.1667
Kv1.1 I/V	3.23232	30.1333	Kv1.1 I/V
DACT3 R/G	73.1814	91.0667	DACT3 R/G	97.249	60.0333
DACT3 K/R	5.64334	11.7667	DACT3 K/R
GluK5 N/D	22.6957	9.10934	GluK5 N/D
GluK5 K/R	86.4609	9.77904	GluK5 K/R
GluA4 R/G	24.372	65.2667	GluA4 R/G
NEIL1 K/R	98.1484	8.05004	NEIL1 K/R
GluK2 I/V	27.9309	82.1667	GluK2 I/V
GluK2 Y/C	3.40827	89.7333	GluK2 Y/C
GluK2 M/V	6.75577	6.69564	GluK2 M/V
GluK2 Q/R	26.0798	80.9	GluK2 Q/R
CYFIP2 K/E	10.2108	83.1667	CYFIP2 K/E
UBE2O S/G	88.8393	16.2333	UBE2O S/G
NOVA1 S/G	2.66241	29.6	NOVA1 S/G
CDK13 Q/R	58.9278	89.5333	CDK13 Q/R	99.0571	61.8667
CACNA1D I/M	1.25945	43.4333	CACNA1D I/M
CACNA1D Y/C	3.38409	21.3	CACNA1D Y/C
CAPS1 E/G	27.6622	24.4667	CAPS1 E/G
COG3 I/V	19.0433	28.8	COG3 I/V	10.5505	33.2333
FLNB Q/R	2.1544	33.8667	FLNB Q/R	0.75188	17.5333
AZIN1 E/G			AZIN1 E/G	100	10.487
AZIN1 S/G			AZIN1 S/G	99.7872	19.4667
GluK1 Q/R	45.6414	62.6333	GluK1 Q/R
SON - 1	6.11111	10.7667	SON - 1
SON - 2	87.0454	13.3424	SON - 2
SON - 3	33.5493	6.98931	SON - 3
SON - 4	5.89914	34.1667	SON - 4
SON - 7	31.6317	22.8644	SON - 7
mGluR4 Q/R	2.1148	9.8	mGluR4 Q/R
TMEM63B Q/R	0.528338	72.3333	TMEM63B Q/R
ZFP397 S/G - 1	39.4366	8.13333	ZFP397 S/G - 1
ZFP397 S/G - 2	35.5932	9.3	ZFP397 S/G - 2
FLNA Q/R	0.675676	30.7	FLNA Q/R	0.91954	18.2667
GABRA3 I/M	24.2244	96.6333	GABRA3 I/M	47.0657	48.4333
GluA3 R/G	47.0688	95.7	GluA3 R/G	18.6228	45.7
5-HT2CR A	91.2307	78.1068	5-HT2CR A
5-HT2CR B	92.8922	70.6068	5-HT2CR B
5-HT2CR E	10.7417	5.95824	5-HT2CR E
5-HT2CR C	31.9519	29.4	5-HT2CR C
5-HT2CR D	0.480307	75.0667	5-HT2CR D
miR-3099-3p	50.5902	89	miR-3099-3p
miR-27a-5p	3.44828	12.8667	miR-27a-5p
miR-423-5p	99.1489	14.0667	miR-423-5p
miR-497-5p	0.600601	6.9	miR-497-5p
miR-376a-2-5p	11.1313	28.6333	miR-376a-2-5p
miR-376b-3p	99.2034	28.1333	miR-376b-3p
miR-376c-3p	98.3957	71.7667	miR-376c-3p
miR-379-5p	13.4454	8.9	miR-379-5p
miR-381-3p	99.9539	44.8	miR-381-3p
miR-411-5p	41.8903	41.9	miR-411-5p
miR-27b-5p	7.13154	21.2333	miR-27b-5p
miR-151-3p - 2	95.4733	14.1	miR-151-3p - 2
miR-99a-5p	13.6719	6.63333	miR-99a-5p
miR-99b-3p - 1	56.1569	7.74595	miR-99b-3p - 1
miR-99b-3p - 2	93.4085	40.8	miR-99b-3p - 2
CDS2 - 1			CDS2 - 1	96.7742	6.33333
CDS2 - 2	57.529	84.8144	CDS2 - 2	89.3349	45.5711
CDS2 - 3	10.3004	7.83333	CDS2 - 3	92.3077	7.6
IFT80 - 1	95.7726	30.9176	IFT80 - 1
IFT80 - 2	92.1828	32.732	IFT80 - 2
IFT80 - 3	86.0952	64.2667	IFT80 - 3	100	8.06667
NRAS	52.044	19.2	NRAS	96.9665	33.5667
JMJD4 - 1			JMJD4 - 1	100	9.9
JMJD4 - 2	94.4682	31.9457	JMJD4 - 2	100	27.7267
JMJD4 - 3	95.6609	29.6	JMJD4 - 3	99.6737	11.9333
JMJD4 - 4	82.7381	6.6	JMJD4 - 4	97.8723	14.9667
JMJD4 - 5	66.8213	18.7	JMJD4 - 5	98.5545	20.4333
JMJD4 - 6	42.3792	15.3333	JMJD4 - 6	99.2492	18.7333
JMJD4 - 7	64.4481	21.9333	JMJD4 - 7	99.2545	24.4333
JMJD4 - 8	92.6103	10.7035	JMJD4 - 8	99.978	22.5357
JMJD4 - 9			JMJD4 - 9	99.1507	12.0333
TBCE	75.7907	67.2	TBCE	96.5517	7.63333
MALT1	92.2256	34.0667	MALT1	99.8744	26.1667
ADAR2 - 1	25.1121	24.2667	ADAR2 - 1
ADAR2 - 2	24.4618	37.5	ADAR2 - 2
ADAR2 - 3	26.4652	27.6	ADAR2 - 3
ADAR2 - 4	44.3922	73.6667	ADAR2 - 4
COPA I/V	3.68664	6.03333	COPA I/V	2.8436	8.7

## Sheet: Supplemental Fig. S6A, S6B
	Retention of editing					Editing site selection:	COPA I/V
Editing site	A1/WT	A1/WT	Editing site	A2/WT	A2/WT
CDS	spleen	cerebral cortex	CDS	spleen	cerebral cortex
COPA I/V	52.2959	115.47	COPA I/V	1.53061	4.41989
SPEG S/G	91.3355	99.633	SPEG S/G	2.0369	30.383
BLCAP Y/C	12.7318	41.5333	BLCAP Y/C	112.732	101.853
BLCAP Q/R	24.7492	48.7485	BLCAP Q/R	103.344	96.3051
BLCAP K/R	6.62252	5.72451	BLCAP K/R	117.219	99.1055
IGFBP7 R/G	108.414	133.333	IGFBP7 R/G	0.0506842	0.259202
IGFBP7 K/R	111.036	127.548	IGFBP7 K/R	1.20193	4.5191
DACT3 R/G	4.44198	38.3236	DACT3 R/G	157.024	109.59
CDK13 Q/R	0.969828	72.4497	CDK13 Q/R	101.886	103.946
COG3 I/V	78.2347	103.819	COG3 I/V	9.22768	24.4213
FLNB Q/R	50.1901	107.283	FLNB Q/R	0.380228	2.3622
FLNA Q/R	78.6496	95.7655	FLNA Q/R	0.729927	0.651466
GluA3 R/G	75.857	97.4922	GluA3 R/G	17.3596	86.6945
GABRA3 I/M	62.6979	101.104	GABRA3 I/M	55.7467	32.3215
CDS2 - 2	11.0457	68.2371	CDS2 - 2	92.5231	92.4305
CDS2 - 3	8.33333	88.9362	CDS2 - 3	100	10.2128
IFT80 - 3	0	15.1452	IFT80 - 3	156.612	93.7759
NRAS	2.87984	52.9514	NRAS	92.0556	57.4653
JMJD4 - 2	0	5.48596	JMJD4 - 2	148.496	93.6858
JMJD4 - 3	0.558659	4.84234	JMJD4 - 3	170.67	106.757
JMJD4 - 4	2.89532	14.6465	JMJD4 - 4	133.185	70.202
JMJD4 - 5	1.79445	25.4902	JMJD4 - 5	122.349	51.3369
JMJD4 - 6	0.88968	33.6957	JMJD4 - 6	117.616	24.7826
JMJD4 - 7	0.95498	33.2827	JMJD4 - 7	127.149	60.3343
JMJD4 - 8	0.0300667	6.02542	JMJD4 - 8	136.906	75.5124
JMJD4 - 9	1.10803	6.47482	JMJD4 - 9	129.363	66.1871
TBCE	4.80349	31.8948	TBCE	134.498	99.8512
MALT1	0.127389	9.98043	MALT1	101.274	118.395
ADAR2 - 1	70.4251	91.7582	ADAR2 - 1
ADAR2 - 2	54.6512	102.933	ADAR2 - 2
ADAR2 - 3	64.1651	96.9807	ADAR2 - 3
ADAR2 - 4	87.2387	96.2443	ADAR2 - 4
COPA I/V	52.2959	115.47	COPA I/V	1.53061	4.41989

## Sheet: Supplemental Fig. S6C
Editing site			Editing site selection:	COPA I/V
CDS	Similarity of Adar preference	Spleen/Cerebral Cortex
COPA I/V	99.157	144.199
SPEG E/G	93.6989	32.6087
BLCAP Y/C	81.1819	68.155
BLCAP Q/R	85.7139	35.6377
BLCAP K/R	99.8868	27.0125
IGFBP7 R/G	99.8527	102.281
IGFBP7 K/R	97.649	103.744
DACT3 R/G	75.9324	65.9224
CDK13 Q/R	59.8707	69.099
COG3 I/V	91.5071	115.394
FLNB Q/R	98.5975	51.7717
FLNA Q/R	99.7561	59.5005
GluA3 R/G	77.1587	47.7534
GABRA3 I/M	71.554	50.1207
CDS2 - 2	68.1941	53.7304
CDS2 - 3	17.9927	97.0213
IFT80 - 3	86.0952	12.5519
NRAS	55.0775	174.826
JMJD4 - 2	94.4682	86.7934
JMJD4 - 3	95.9872	40.3153
JMJD4 - 4	84.8658	226.768
JMJD4 - 5	68.2668	109.269
JMJD4 - 6	43.1299	122.174
JMJD4 - 7	65.1935	111.398
JMJD4 - 8	92.6322	210.545
TBCE	79.2389	11.3591
MALT1	92.3512	76.8102
COPA I/V	99.157	144.199
